# Supplementary material for: Chemically Synthesized Glycosides of Hydroxylated Flavylium Ions as Suitable Models of Anthocyanins: Binding to Iron Ions and Human Serum Albumin, Antioxidant Activity in Model Gastric Conditions
Source: Molecules. 2014 Dec 11;19(12):20709–30. doi: 10.3390/molecules191220709 (PMC6271493; doi:10.3390/molecules191220709)

## Supplementary Materials

**Figure S1.** Time dependence of the  $A(470\text{ nm})$  (■) and  $A(650\text{ nm})$  (●) after addition of  $\text{Fe}^{\text{II}}$  (5 equiv.) to a P2 solution (pH 4 acetate buffer, 25 °C, pigment concentration = 50  $\mu\text{M}$ ).

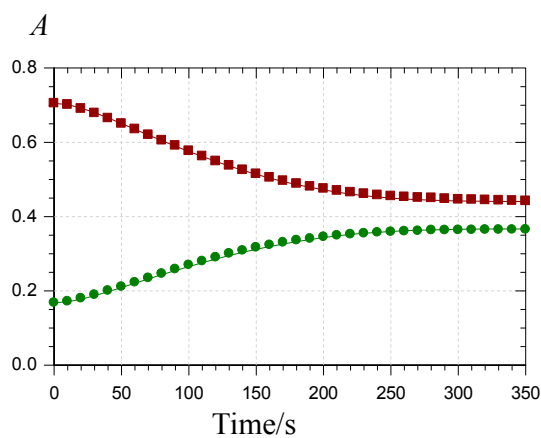

**Figure S2.** Spectroscopic titration of P1 in the absence (■, 550 nm) or presence (●, 580 nm, 5 equiv.) of HSA. (A) spectra recorded immediately after P1 addition, (B) spectra recorded after equilibration over *ca.* 24 h.

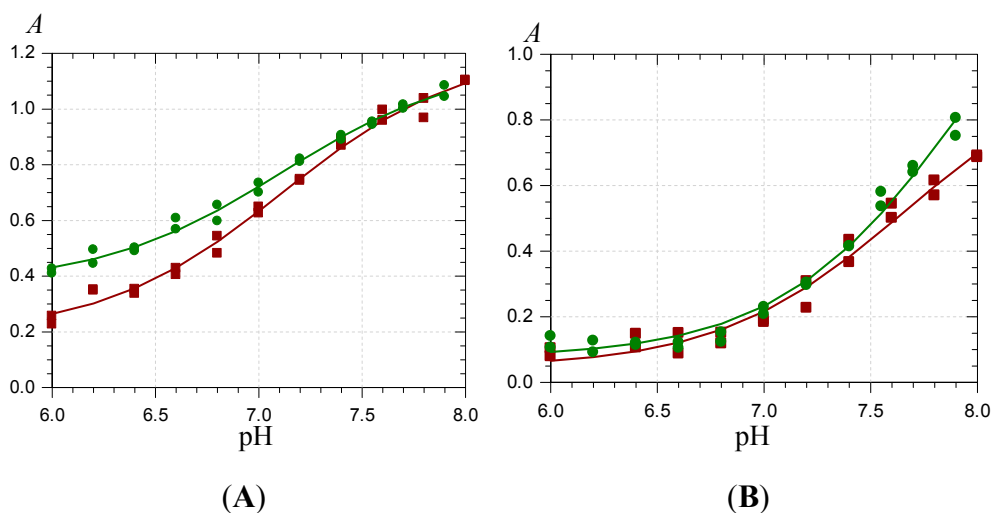

**Figure S3.** Distribution diagram of P1 species at equilibrium around neutrality (in the presence or absence of HSA): neutral quinonoid bases (—), anionic quinonoid base (—), chalcone (—).

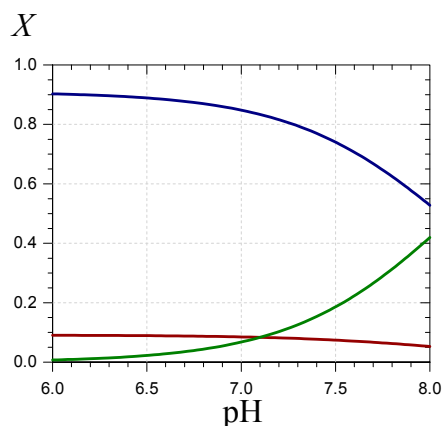

Supplement: Supplementary file 1 [file molecules-19-20709-s001.pdf]
